# Supplementary material for: Exploring mental health services for youth experiencing homelessness in East Asia Pacific regions: A systematic scoping review.
Source: Preprints.org preprint supplement (doi:10.20944/preprints202405.1371.v1), 2024-05-21
Supplement: Supplementary file 1 [file supplementary]

**Appendices**

**Appendix A**

***Preferred Reporting Items for Systematic reviews and Meta-Analyses extension for Scoping Reviews (PRISMA-ScR) Checklist***

| **SECTION** | **ITEM** | **PRISMA-ScR CHECKLIST ITEM** | **REPORTED ON PAGE #** |
| --- | --- | --- | --- |
| **TITLE** | | | |
| Title | 1 | Identify the report as a scoping review. | 1 |
| **ABSTRACT** | | | |
| Structured summary | 2 | Provide a structured summary that includes (as applicable): background, objectives, eligibility criteria, sources of evidence, charting methods, results, and conclusions that relate to the review questions and objectives. | 2 |
| **INTRODUCTION** | | | |
| Rationale | 3 | Describe the rationale for the review in the context of what is already known. Explain why the review questions/objectives lend themselves to a scoping review approach. | 4–5 |
| Objectives | 4 | Provide an explicit statement of the questions and objectives being addressed with reference to their key elements (e.g., population or participants, concepts, and context) or other relevant key elements used to conceptualize the review questions and/or objectives. | 5 |
| **METHODS** | | | |
| Protocol and registration | 5 | Indicate whether a review protocol exists; state if and where it can be accessed (e.g., a Web address); and if available, provide registration information, including the registration number. | 5 |
| Eligibility criteria | 6 | Specify characteristics of the sources of evidence used as eligibility criteria (e.g., years considered, language, and publication status), and provide a rationale. | 5 |
| Information sources* | 7 | Describe all information sources in the search (e.g., databases with dates of coverage and contact with authors to identify additional sources), as well as the date the most recent search was executed. | 5–6 |
| Search | 8 | Present the full electronic search strategy for at least 1 database, including any limits used, such that it could be repeated. | 6 |
| Selection of sources of evidence† | 9 | State the process for selecting sources of evidence (i.e., screening and eligibility) included in the scoping review. | 6 |
| Data charting process‡ | 10 | Describe the methods of charting data from the included sources of evidence (e.g., calibrated forms or forms that have been tested by the team before their use, and whether data charting was done independently or in duplicate) and any processes for obtaining and confirming data from investigators. | 6 |
| Data items | 11 | List and define all variables for which data were sought and any assumptions and simplifications made. | 8 |
| Critical appraisal of individual sources of evidence§ | 12 | If done, provide a rationale for conducting a critical appraisal of included sources of evidence; describe the methods used and how this information was used in any data synthesis (if appropriate). | 6 |
| Synthesis of results | 13 | Describe the methods of handling and summarizing the data that were charted. | 7 |
| **RESULTS** | | | |
| Selection of sources of evidence | 14 | Give numbers of sources of evidence screened, assessed for eligibility, and included in the review, with reasons for exclusions at each stage, ideally using a flow diagram. | 7–8 (**Table 3**) |
| Characteristics of sources of evidence | 15 | For each source of evidence, present characteristics for which data were charted and provide the citations. | 8 (**Table 4**) |
| Critical appraisal within sources of evidence | 16 | If done, present data on critical appraisal of included sources of evidence (see item 12). | 6–11 (**Appendix C**) |
| Results of individual sources of evidence | 17 | For each included source of evidence, present the relevant data that were charted that relate to the review questions and objectives. | 8 (**Table 4**) |
| Synthesis of results | 18 | Summarize and/or present the charting results as they relate to the review questions and objectives. | 8–12 |
| **DISCUSSION** | | | |
| Summary of evidence | 19 | Summarize the main results (including an overview of concepts, themes, and types of evidence available), link to the review questions and objectives, and consider the relevance to key groups. | 12–13 |
| Limitations | 20 | Discuss the limitations of the scoping review process. | 17 |
| Conclusions | 21 | Provide a general interpretation of the results with respect to the review questions and objectives, as well as potential implications and/or next steps. | 18–19 |
| **FUNDING** | | | |
| Funding | 22 | Describe sources of funding for the included sources of evidence, as well as sources of funding for the scoping review. Describe the role of the funders of the scoping review. | 20 |

JBI = Joanna Briggs Institute; PRISMA-ScR = Preferred Reporting Items for Systematic reviews and Meta-Analyses extension for Scoping Reviews.

* Where *sources of evidence* (see second footnote) are compiled from, such as bibliographic databases, social media platforms, and Web sites.

† A more inclusive/heterogeneous term used to account for the different types of evidence or data sources (e.g., quantitative and/or qualitative research, expert opinion, and policy documents) that may be eligible in a scoping review as opposed to only studies. This is not to be confused with *information sources* (see first footnote).

‡ The frameworks by Arksey and O’Malley (6) and Levac and colleagues (7) and the JBI guidance (4, 5) refer to the process of data extraction in a scoping review as data charting*.*

§The process of systematically examining research evidence to assess its validity, results, and relevance before using it to inform a decision. This term is used for items 12 and 19 instead of "risk of bias" (which is more applicable to systematic reviews of interventions) to include and acknowledge the various sources of evidence that may be used in a scoping review (e.g., quantitative and/or qualitative research, expert opinion, and policy document).

*From:* Tricco AC, Lillie E, Zarin W, O'Brien KK, Colquhoun H, Levac D, et al. PRISMA Extension for Scoping Reviews (PRISMAScR): Checklist and Explanation. Ann Intern Med. 2018;169:467–473.

**Appendix B**

***Search terms used***

**Medline**

| **Category** | **Search terms** |
| --- | --- |
| YEH | ((homeless* and (child* or youth* or adolescen* or teen* or young person* or young people*)) or street child* or street sleep* or "homeless* youth" or ill-housed person* or rough sleeper* or railway boy* or street dweller* or refugee*)  (Homeless persons or Homelessness or Homeless family or Homeless Shelters or Homeless Youth or Homeless single person or "outreach to the homeless" or homeless mentally ill or homeless shelter resident or Homeless Health Concerns)  (Runaways or Runaway children or Street Youth) |
| **AND** |  |
| Mental health intervention | (mental health service* or therapeutic support* or counselling or counseling or housing program* or temporary shelter* or homeless shelter* or psychological counseling or psychological counselling or short-term temporary care or short-term care or youth homeless* shelter or non government* organisation* or non government* organization* or non-government* organisation* or non-government* organization* or NGO* or mental health care or mental health support* or cognitive behavioural therap* or cognitive behavioral therap* or CBT* or substance abuse therap* or outreach program* or outreach support* or mental health intervention* or mental health* or life counseling or life counselling or overcrowded or refugee* or emergency accommodation* or homeless* facilit* or rehabilitation* or prevention approach* or social work* or therap*)  Mental Health Services/ or Child Guidance/ or Community Mental Health Services/ or Counseling/ or Emergency Services, Psychiatric/ or Social Work, Psychiatric/  (health service, mental or health services, mental or hygiene service, mental or hygiene services, mental or mental health service or mental health services or mental hygiene service or mental hygiene services or service, mental health or service, mental hygiene or services, mental health or services, mental hygiene) |
| **AND** |  |
| EAP countries | (east asia* pacific or east asia* pacific countr* or cambodia* or china or chinese* or hong kong or indonesia* or japan* or south korea* or lao* pdr or macau or macanese or malaysia* or mongolia* or myanmar or pacific island* or papua new guinea or papuans or philippin* or filipin* or the philippine* or singapore* or taiwan* or thai or timor-leste or vietnam*)  exp Cambodia/ or exp Indochina/ or exp Indonesia/ or exp Laos/ or exp Malaysia/ or exp Myanmar/ or exp Philippines/ or exp Singapore/ or exp Thailand/ or exp Timor-Leste/ or exp Vietnam/ or exp China/ or exp Japan/ or exp Korea/ or exp Mongolia/ or exp Taiwan/ or exp Indonesia/ or exp Japan/ or exp Macau/ or exp Philippines/ or exp Taiwan/ |
| **Results: 120** |  |

**PsychInfo**

| **Category** | **Search terms** |
| --- | --- |
| YEH | ((homeless* and (child* or youth* or adolescen* or teen*)) or street child* or street sleep* or ill-housed person* or rough sleep* or street dwell* or railway boy*)  (child, homeless or child, street or children, homeless or children, street or homeless child or homeless children or homeless youth or homeless youths or runaway or runaways or street child or street children or street youth or youth, homeless or youth, street or youths, homeless or youths, street) |
| **AND** |  |
| Mental health intervention | (mental health service* or therapeutic support* or counselling or counseling or housing program* or temporary shelter* or homeless shelter* or psychological counseling or psychological counselling or short-term temporary care or short-term care or youth homeless* shelter or non government* organisation* or non government* organization* or non-government* organisation* or non-government* organization* or NGO* or mental health care or mental health support* or cognitive behavioural therap* or cognitive behavioral therap* or CBT* or substance abuse therap* or outreach program* or outreach support* or mental health intervention* or mental health* or life counseling or life counselling or overcrowded or centre base* or center base* or emergency accommodation* or homeless* facilit* or food bank* or rehabilitation* or prevention approach* or social work* or therap*)  (Rehabilitation Counseling or School Counseling or Aftercare or School Counseling or Mental Health Services or Community Mental Health Services or Early Intervention or Family Intervention or School Based Intervention or Mental Health Programs or Crisis Intervention Services or Hot Line Services or Suicide Prevention Centers or Home Visiting Programs or Suicide Prevention Centers) |
| **AND** |  |
| EAP countries | (east asia* pacific or east asia* pacific countr* or cambodia* or china or chinese* or hong kong or indonesia* or japan* or south korea* or lao* pdr or macau or macanese or malaysia* or mongolia* or myanmar or pacific island* or papua new guinea or papuans or philippin* or filipin* or the philippine* or singapore* or taiwan* or thai or timor-leste or vietnam*)  (Pacific Islanders or Asia Southeastern or Asia Eastern) |
| **Results: 153** |  |

**PubMed**

| **Category** | **Search terms** |
| --- | --- |
| YEH | (((((((((((((homeless*)) AND (child*)) OR (youth*)) OR (adolescen*)) OR (teen*)) OR (ill-housed person*)) OR ("homeless teen")) OR ("street sleeper"[tiab:~0])) OR ("children of the street"[tiab:~0])) OR ("street youth")) OR ("runaway* child*")) OR ("runaway* adolescen*")) OR ("street child*") |
| **AND** |  |
| Mental health intervention | ((((((((((((((((((((((((((((((((((mental health service*) OR (therapeutic support*)) OR (counselling)) OR (counseling)) OR ("housing program*")) OR ("temporary shelter*")) OR ("homeless shelter*")) OR ("psychological counseling")) OR ("psychological counselling")) OR ("temporary care")) OR ("short-term care")) OR ("youth homeless* shelter"[tiab:~10])) OR ("non government* organisation")) OR ("non government* organization")) OR ("non-government* organisation")) OR ("non-government* organization")) OR ("NGO"[tiab])) OR ("mental health care")) OR ("mental health support*")) OR ("cognitive behavioural therap*")) OR ("cognitive behavioral therap*")) OR (CBT[tiab])) OR ("substance abuse therap*")) OR ("outreach program*")) OR ("outreach support*")) OR ("mental health intervention")) OR ("rehabilitation counseling")) OR ("community mental health service*")) OR ("family intervention*")) OR ("mental health program*")) OR ("crisis intervention service*")) OR ("hot line service*")) OR ("suicide prevention center*") ) OR (psychotherap*)) OR ("homeless intervention*") |
| **AND** |  |
| EAP countries | ((((((((((((((((((((((((((((east asia* pacific) OR (east asia* pacific countr*)) OR (cambodia*)) OR (china)) OR (chinese)) OR (hong kong)) OR (indonesia*)) OR (japan*)) OR (south korea*)) OR (lao* pdr)) OR (macau)) OR (macanese)) OR (malaysia*)) OR (mongolia*)) OR (myanmar)) OR (pacific island*)) OR (papua new guinea)) OR (papuans)) OR (philippin*)) OR ("the philippin*")) OR (filipin*)) OR (singapore*)) OR (taiwan*)) OR (thai)) OR (timor-leste)) OR (vietnam*)) OR ("south-east asia*")) OR ("southeast asia*")) OR ("east asia*") |
| **Results: 2,546** |  |

**Scopus**

| **Category** | **Search terms** |
| --- | --- |
| YEH | "homeless*" OR "homeless* youth" OR "homeless* child*" OR "homeless* adolescen*" OR "homeless* teen" OR " homeless* young person*" OR "homeless* young people*" OR "street child*" OR "street sleeper" OR "homeless* youth" OR "ill-housed person" OR "street youth" OR runaway* OR "runaway youth*" OR "street youth*" OR "rough sleep*" OR "railway boy*" OR "street dwell*" OR "refugee*” |
| **AND** |  |
| Mental health intervention | "mental health service*" OR "mental health intervention*" OR "psychological intervention*" OR "therap* support*" OR counseling OR “counselling” OR "psychological counseling" OR “psychological counselling” OR "short-term temporary care" OR "short-term care" OR "youth homeless* shelter" OR "homeless* shelter*" OR "non-government* organisation*" OR “non-governmen* organization” OR NGO* OR "mental health care" OR "mental health support" OR "cognitive behavioural therap*" OR “cognitive behavioral therap*” OR CBT OR "outreach program*" OR "outreach support*" OR "outreach work*" OR "homeless* policy*" OR "homeless* policies" OR "homeless* law*" OR "policies" or "policy" OR "community service*" OR "community mental health service*" OR "emergency service*" OR "family therap*" OR "family intervention*" OR "mental health program*" OR "crisis intervention* service*" OR "hotline service*" OR "school based intervention*" OR "suicide prevention cent*" OR "home visiting program*" OR "community program*" OR "family based intervention*" OR "family based intervention*" OR "emergency accommodation*" OR "homeless* facilit*" OR "food bank*" OR rehabilitation* OR "social work*" |
| **AND** |  |
| EAP countries | "east asia* pacific" OR "east asia* pacific countr*" OR cambodia* OR china OR chinese OR "hong kong" OR indonesia* OR japan* or "south korea*" OR "lao* pdr" OR macau OR macanese OR malaysia* OR mongolia* OR myanmar OR "pacific island*" OR "papua new guinea" OR papuans OR philippin* OR "the philippin*" OR filipin* OR singapore* OR taiwan* OR thai* OR "timor-leste" OR viet* |
| **Results: 613** |  |

**Web of Science**

| **Category** | **Search terms** |
| --- | --- |
| YEH | ((((((((((((((((ALL=(homeless*)) AND ALL=(youth*)) OR ALL=(child*)) OR ALL=(adolescen*)) OR ALL=(teen)) OR ALL=("street child*")) OR ALL=("street sleeper")) OR ALL=("ill-housed person*")) OR ALL=("street youth*")) OR ALL=(runaway*)) OR ALL=("runaway youth*")) OR ALL=("homeless youth*")) OR ALL=("rough sleep*")) OR ALL=("railway boy*")) OR ALL=("street dwell*")) OR ALL=("refugee*")) OR ALL=("left behind child*") |
| **AND** |  |
| Mental health intervention | (((((((((((((((((((((((((((((((((((((ALL=("mental health service*")) OR ALL=("mental health intervention*")) OR ALL=("psychological intervention*")) OR ALL=("therap* support*")) OR ALL=(counseling)) OR ALL=(counselling)) OR ALL=("psychological counseling")) OR ALL=("psychological counselling")) OR ALL=("short-term temporary care")) OR ALL=("short-term care")) OR ALL=("youth homeless* shelter*")) OR ALL=("homeless* shelter")) OR ALL=("non-government* organisation*")) OR ALL=("non-government* organization*")) OR ALL=(NGO*)) OR ALL=("mental health care")) OR ALL=("mental health support*")) OR ALL=("cognitive behavioural therap*")) OR ALL=("cognitive behavioral therap*")) OR ALL=(CBT)) OR ALL=("motivation* interview*")) OR ALL=("substance abuse therap*")) OR ALL=("outreach program*")) OR ALL=("outreach support*")) OR ALL=("outreach work*")) OR ALL=(policy)) OR ALL=("mental health*")) OR ALL=("life counseling")) OR ALL=("life counselling")) OR ALL=("overcrowded")) OR ALL=("centre based")) OR ALL=("center based")) OR ALL=("emergency accommodation")) OR ALL=("homeless* facilit*")) OR ALL=("food bank*")) OR ALL=("rehabilitation*")) OR ALL=("social work*")) OR ALL=("therap*") |
| **AND** |  |
| EAP countries | (((((((((((((((((((((((((ALL=("east asia* pacific")) OR ALL=("east asia* pacific countr*")) OR ALL=(cambodia*)) OR ALL=(china)) OR ALL=(chinese)) OR ALL=("hong kong")) OR ALL=(indonesia*)) OR ALL=(japan*)) OR ALL=("south korea*")) OR ALL=("lao* pdr")) OR ALL=(macau)) OR ALL=(manganese)) OR ALL=(malaysia*)) OR ALL=(mongolia*)) OR ALL=(myanmar)) OR ALL=("pacific island*")) OR ALL=("papua new guinea")) OR ALL=(papuans)) OR ALL=(philippin*)) OR ALL=("the philippin*")) OR ALL=("filipin*")) OR ALL=(singapore*)) OR ALL=(tawain*)) OR ALL=(thai*)) OR ALL=("timor-leste")) OR ALL=(vietnam*) |
| **Results: 92** |  |

**Appendix C**

***The Critical Appraisal Skills Programme (CASP) checklists***
